# Supplementary material
Source: publisher figshare collection journal article supplement (https://acs.figshare.com/ndownloader/files/5664885)

# $\alpha$ -Regioselective Barbier Reaction of Carbonyl Compounds and Allyl Halides Mediated by Praseodymium

San Wu, Ying Li and Songlin Zhang \*

Key Laboratory of Organic Synthesis of Jiangsu Province, College of Chemistry,  
Chemical Engineering and Materials Science, Dushu Lake Campus,  
Soochow University, Suzhou, 215123, People's Republic of China.  
[zhangsl@suda.edu.cn](mailto:zhangsl@suda.edu.cn)

NMR spectra

S2-S24

3a

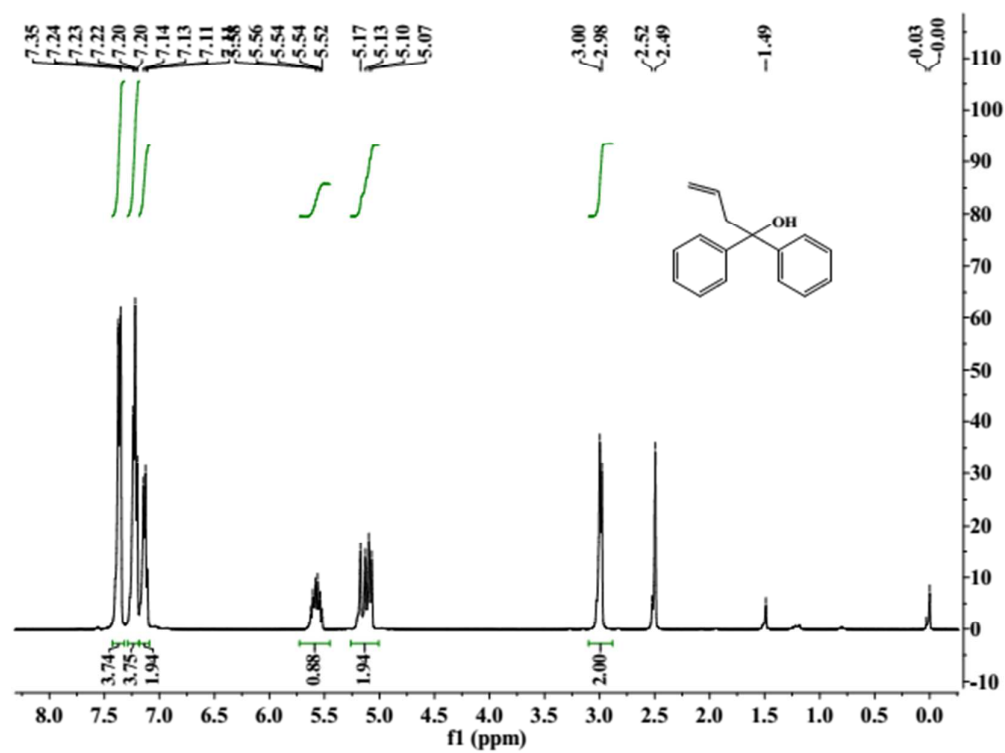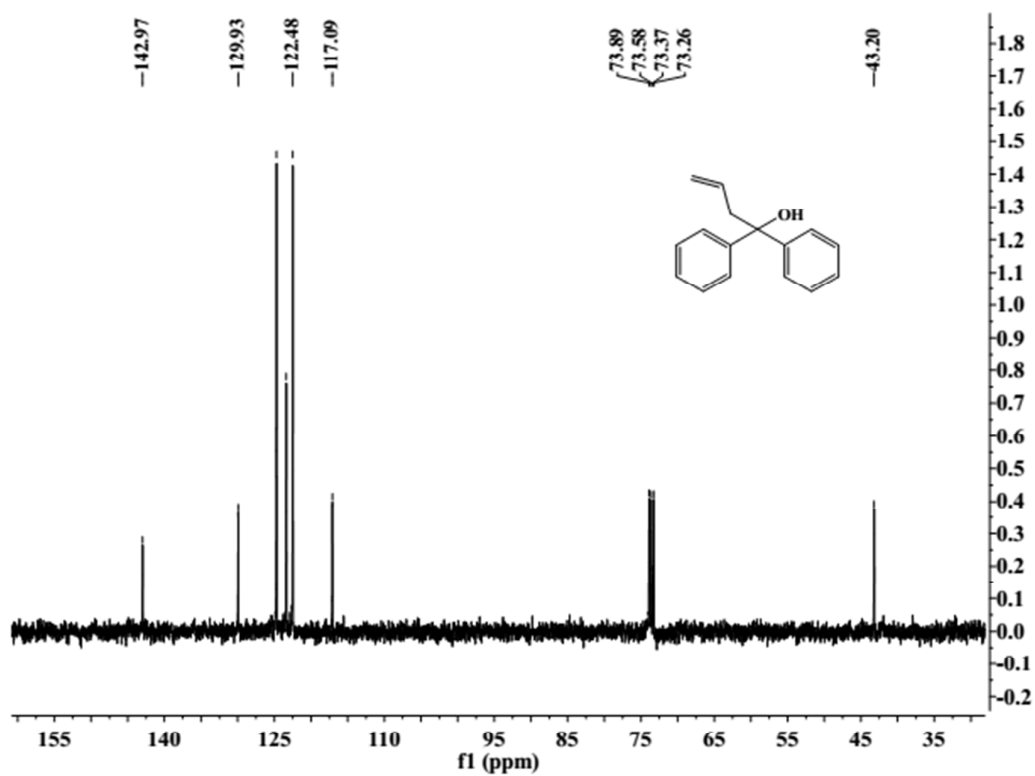

3b

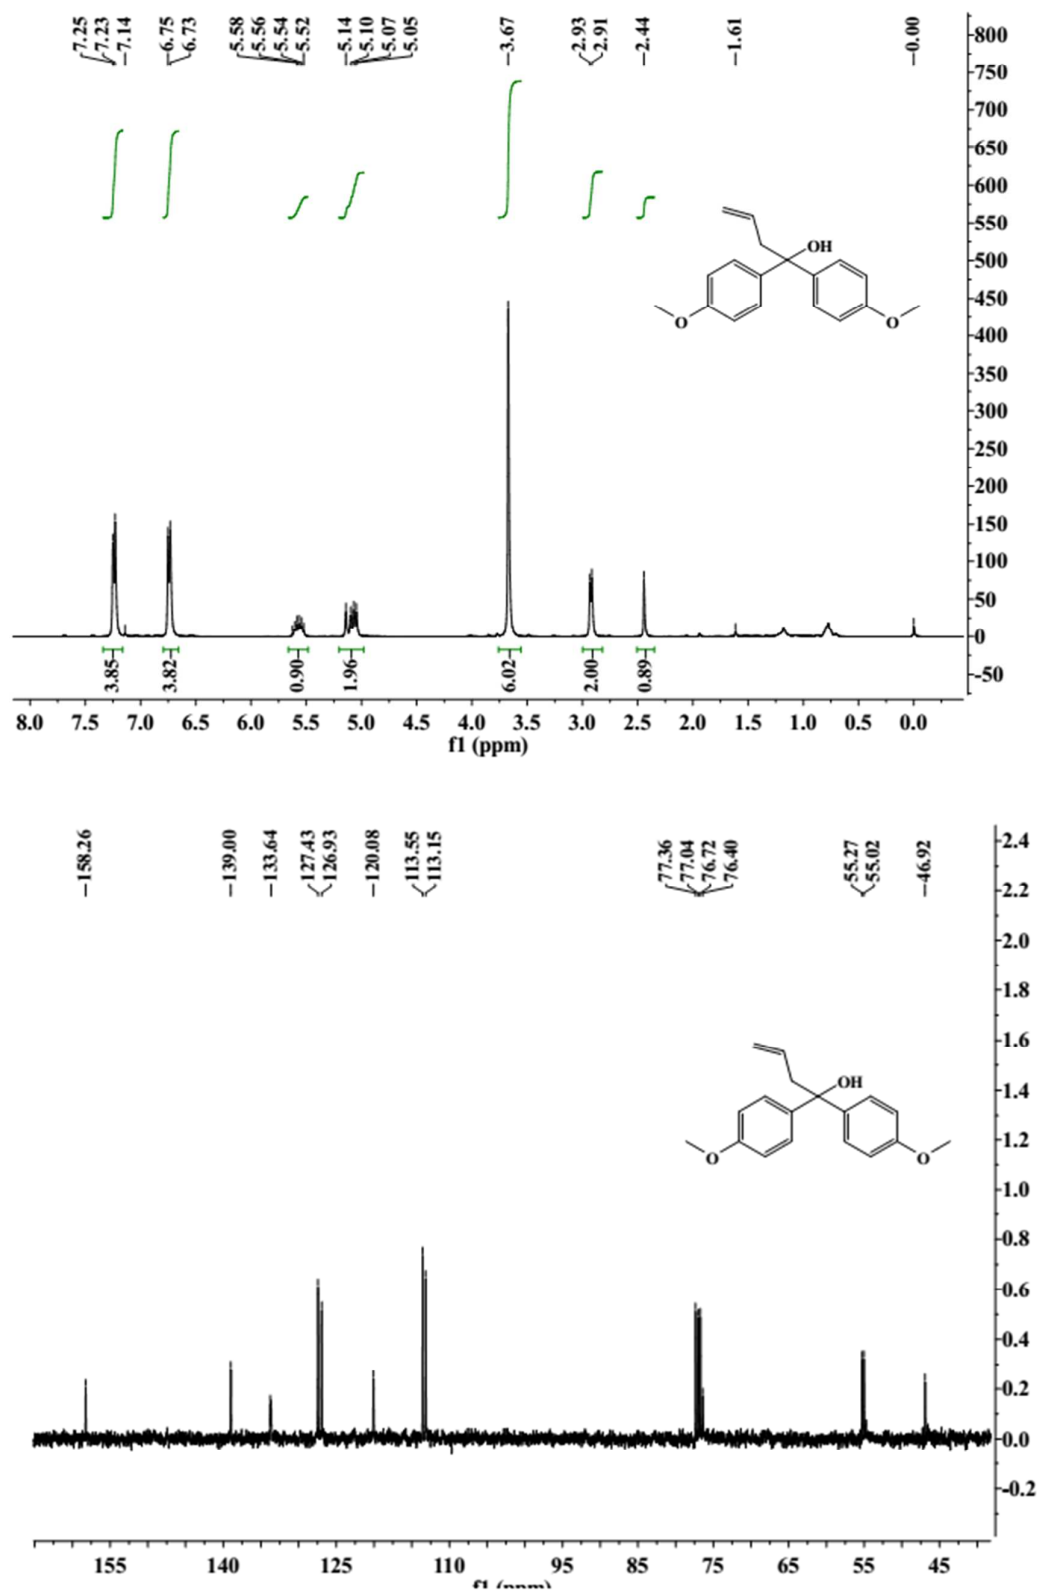

3c

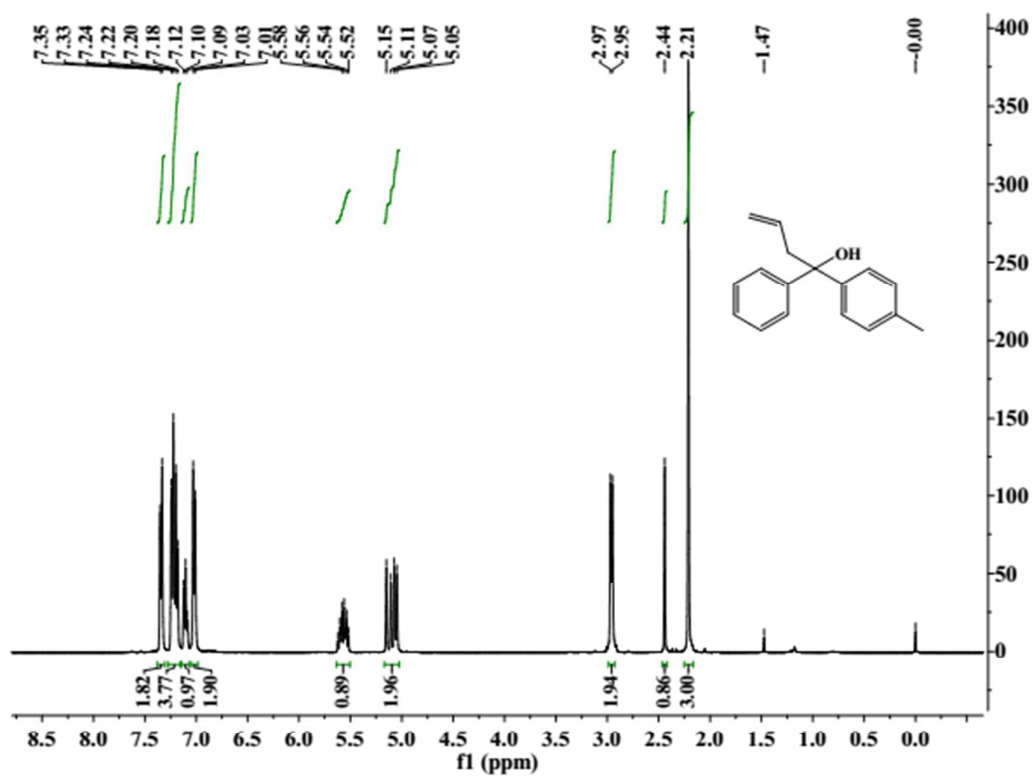

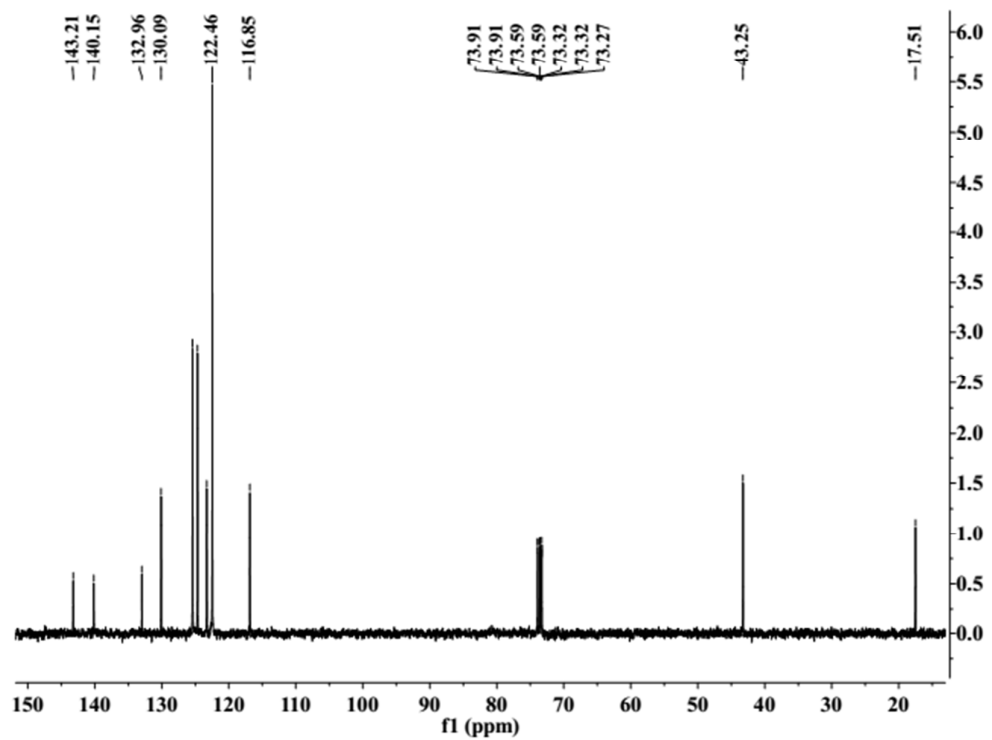

3d

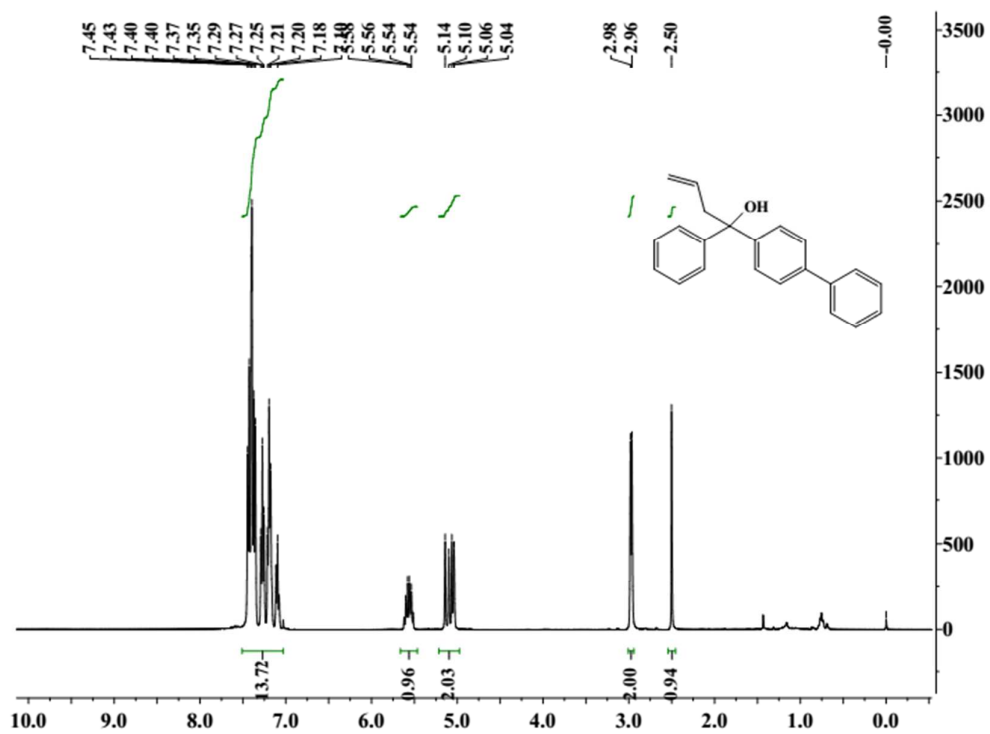

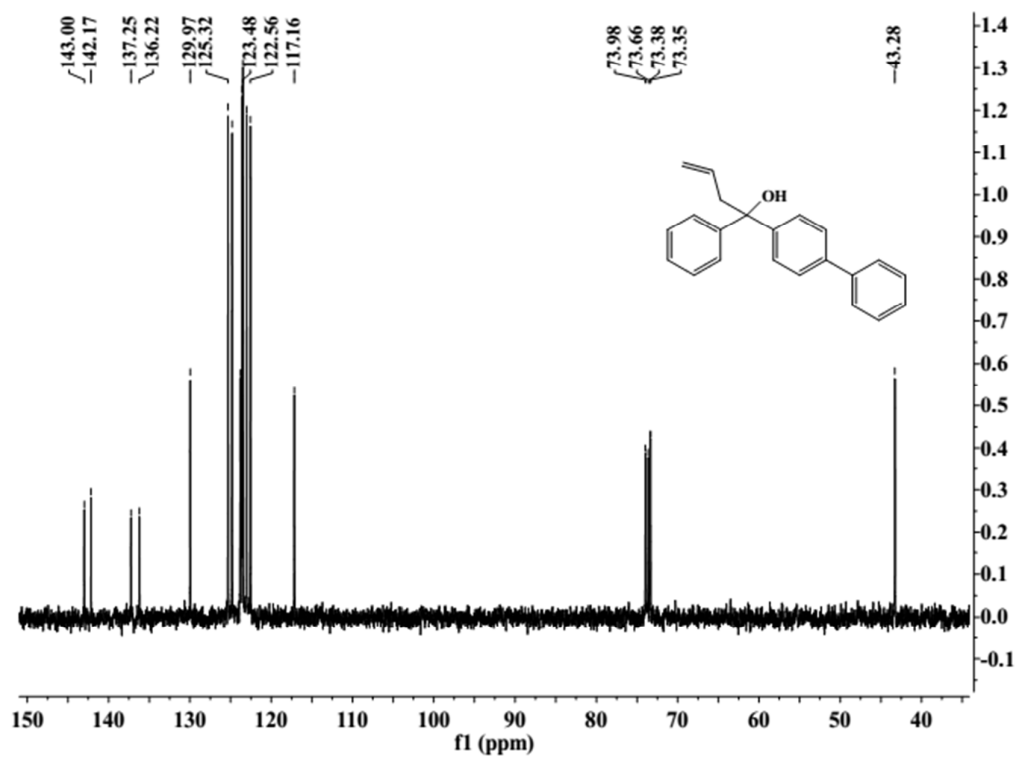

3e

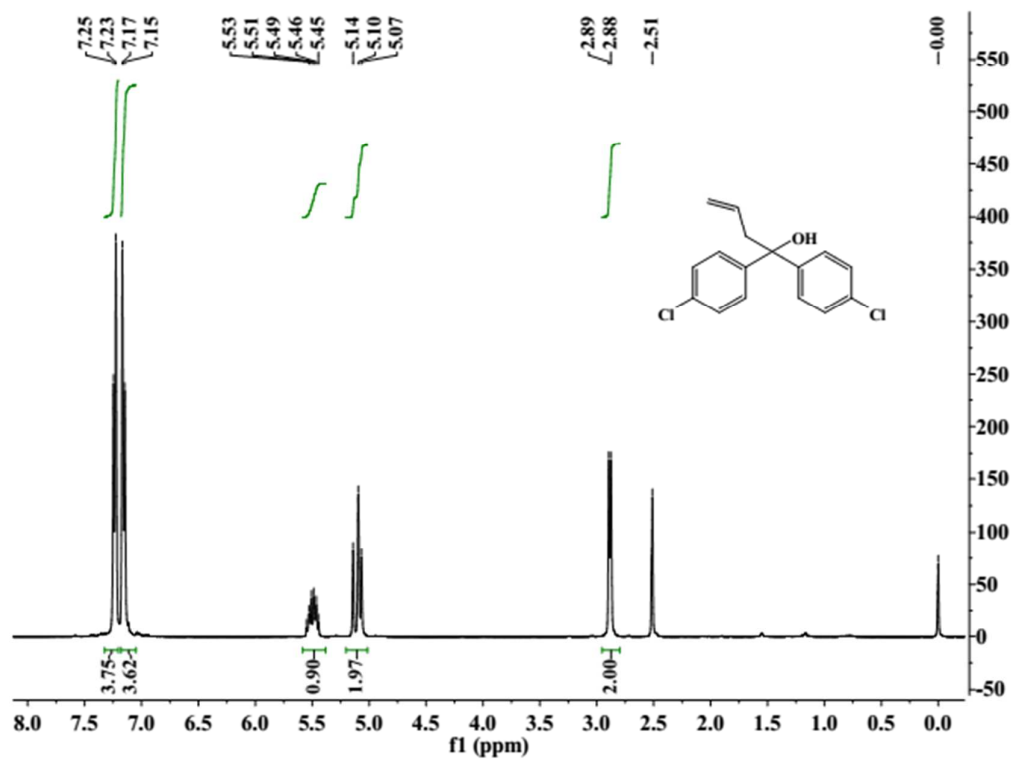

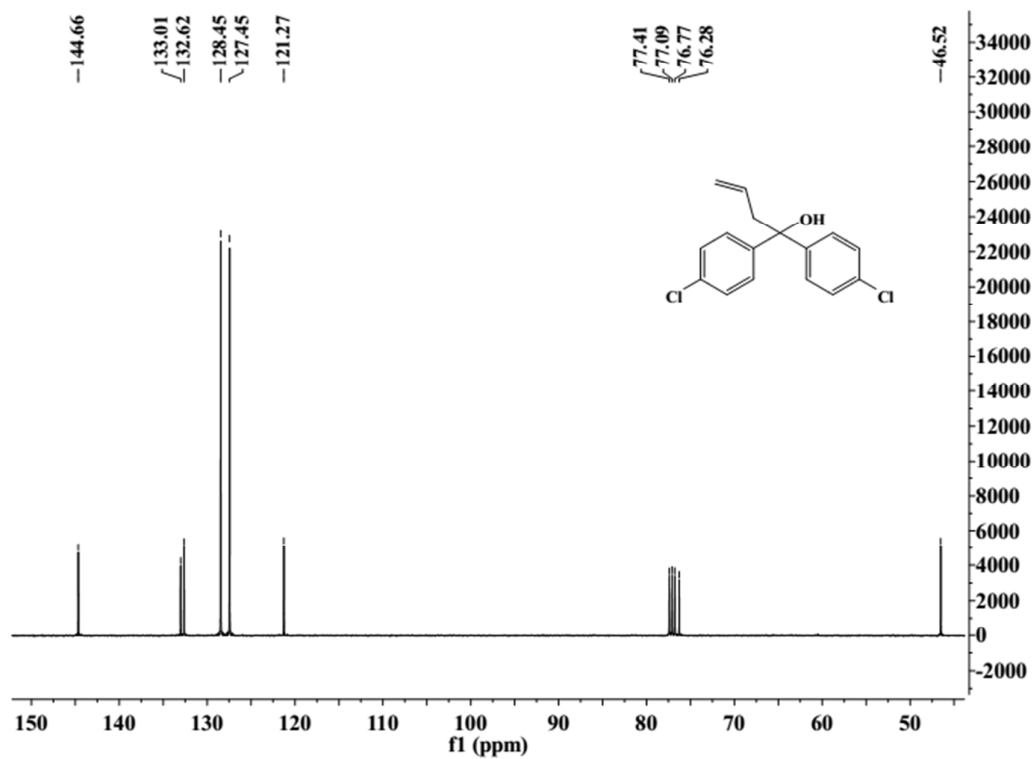

3f

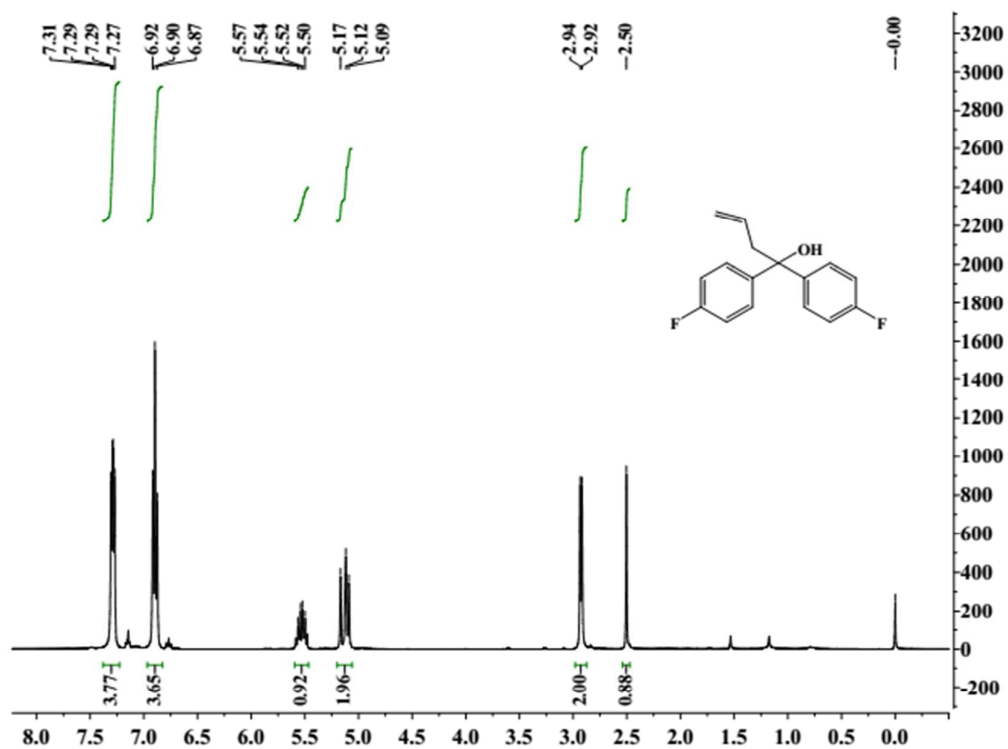

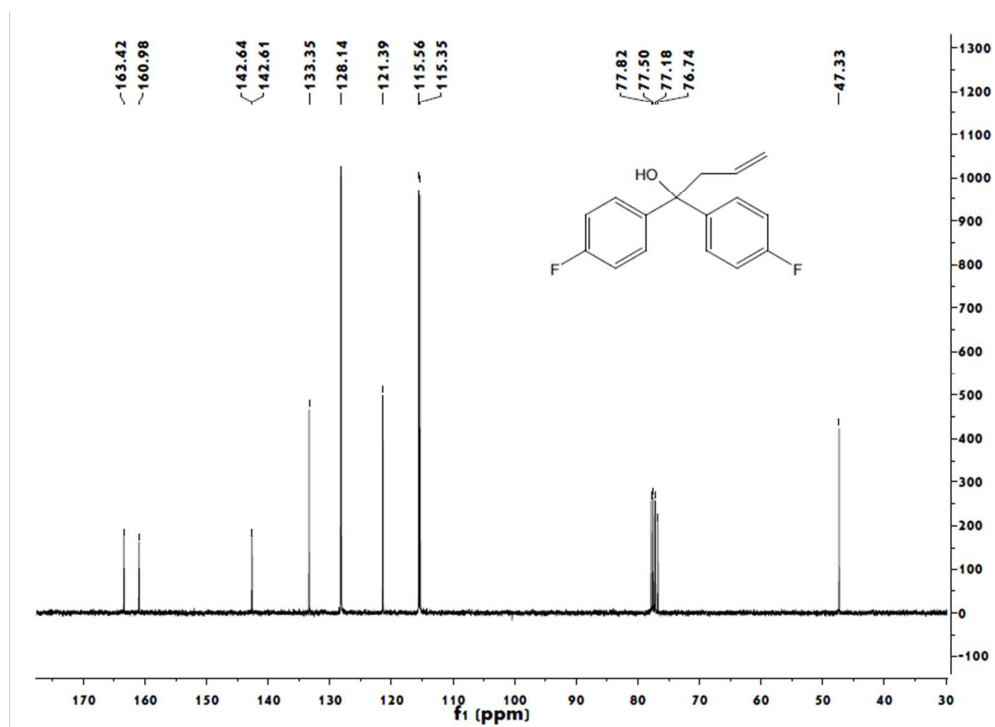

3g

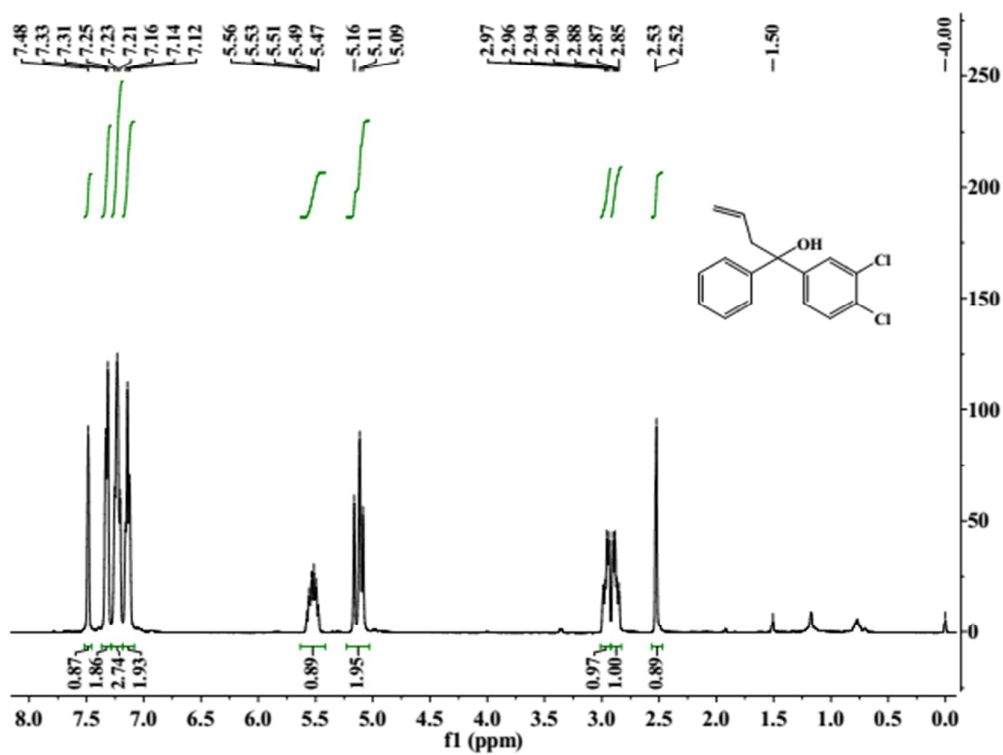



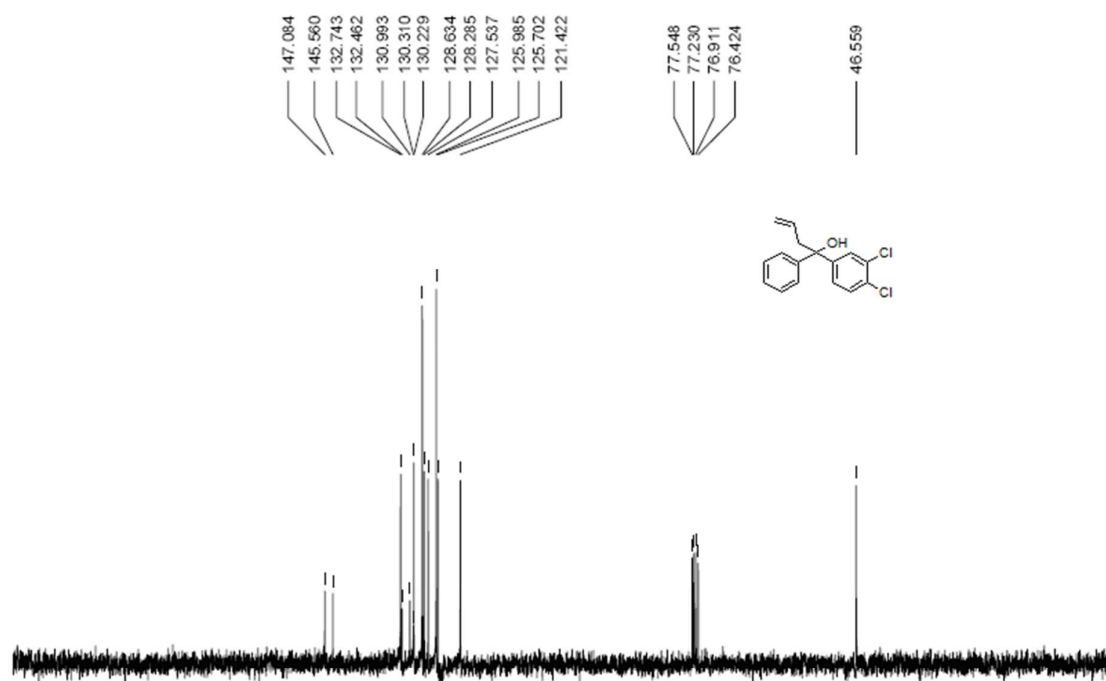

**3h**

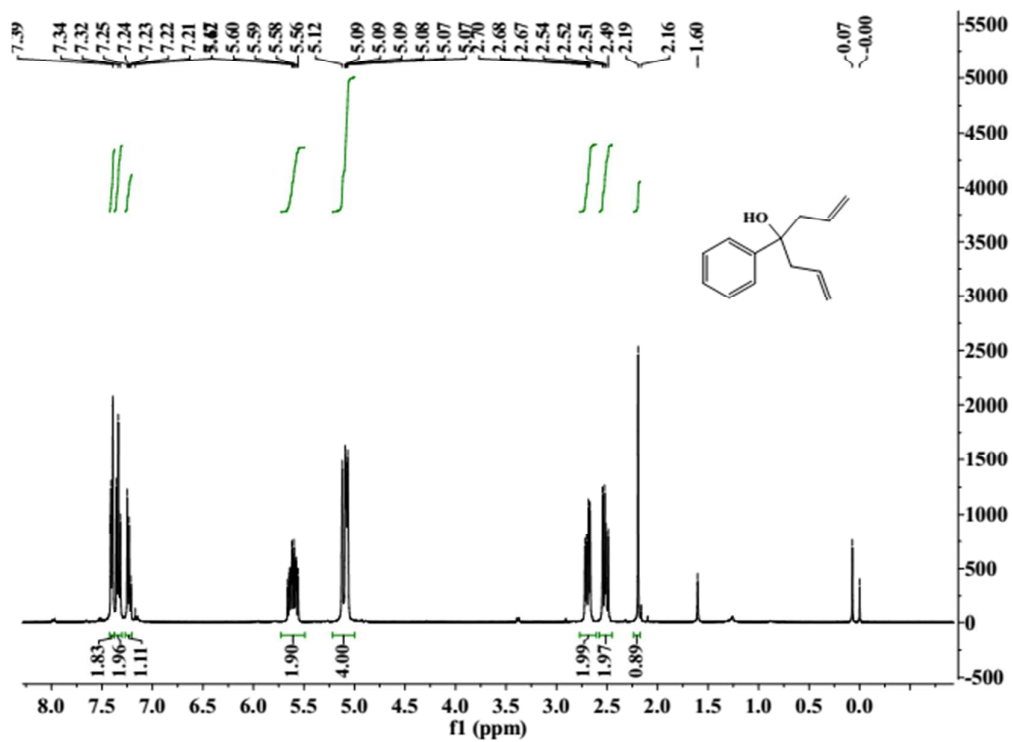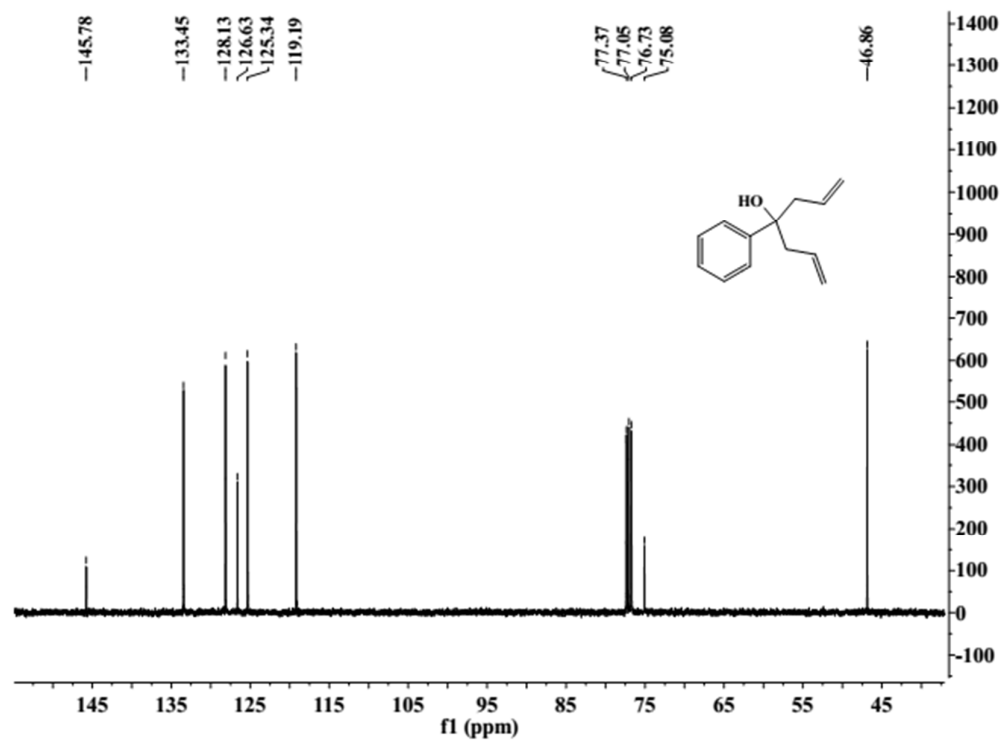

4a

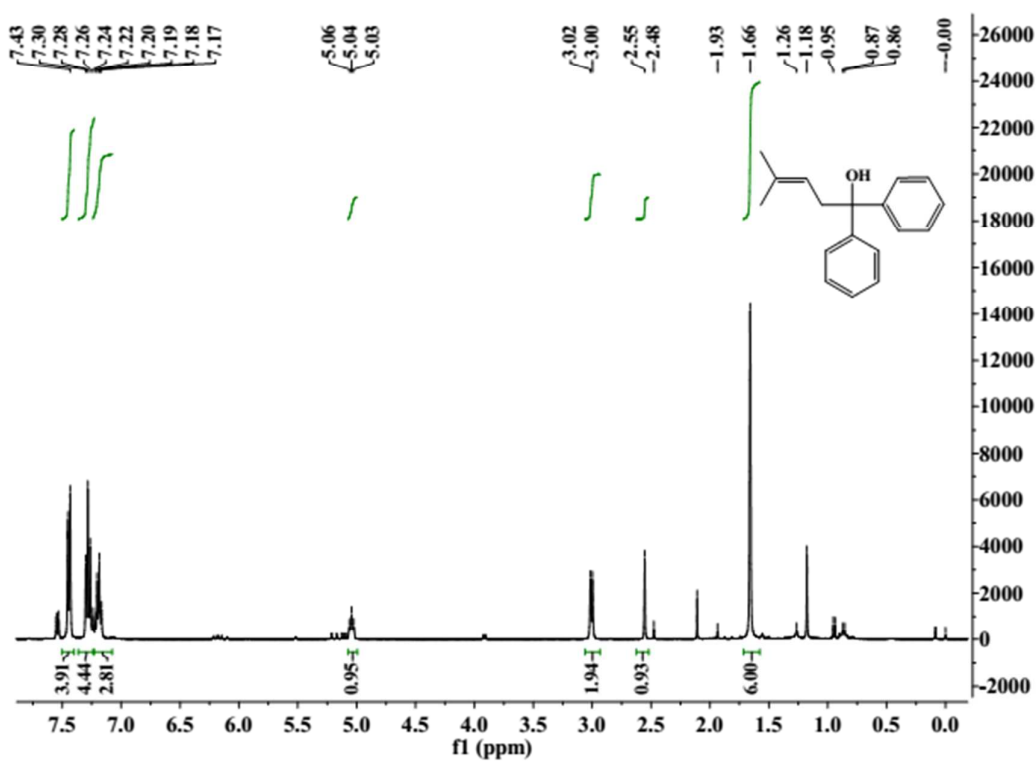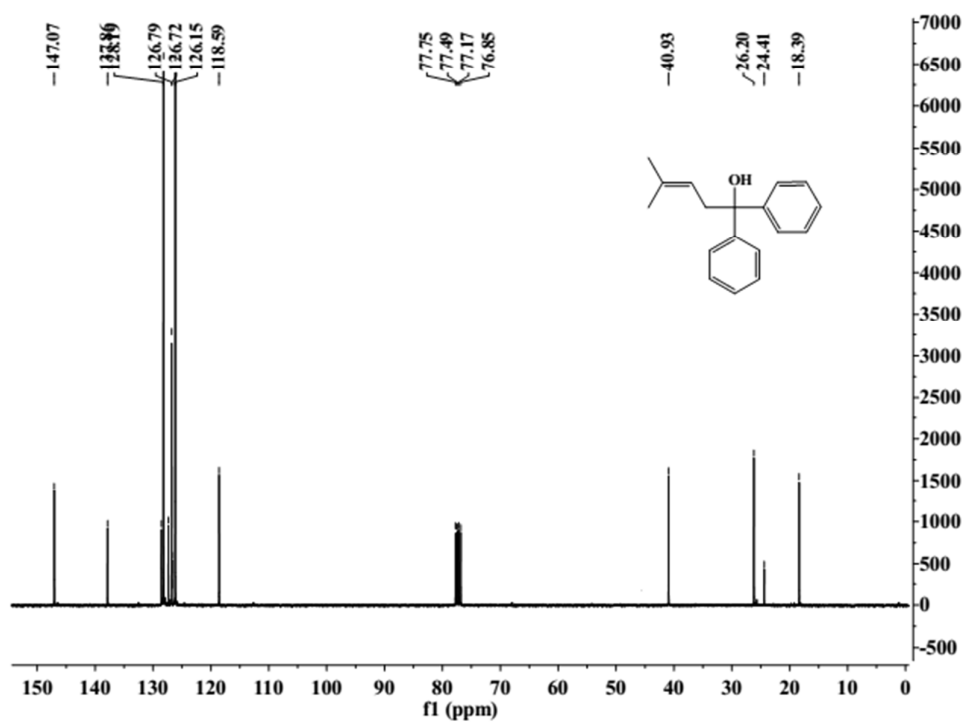

4b

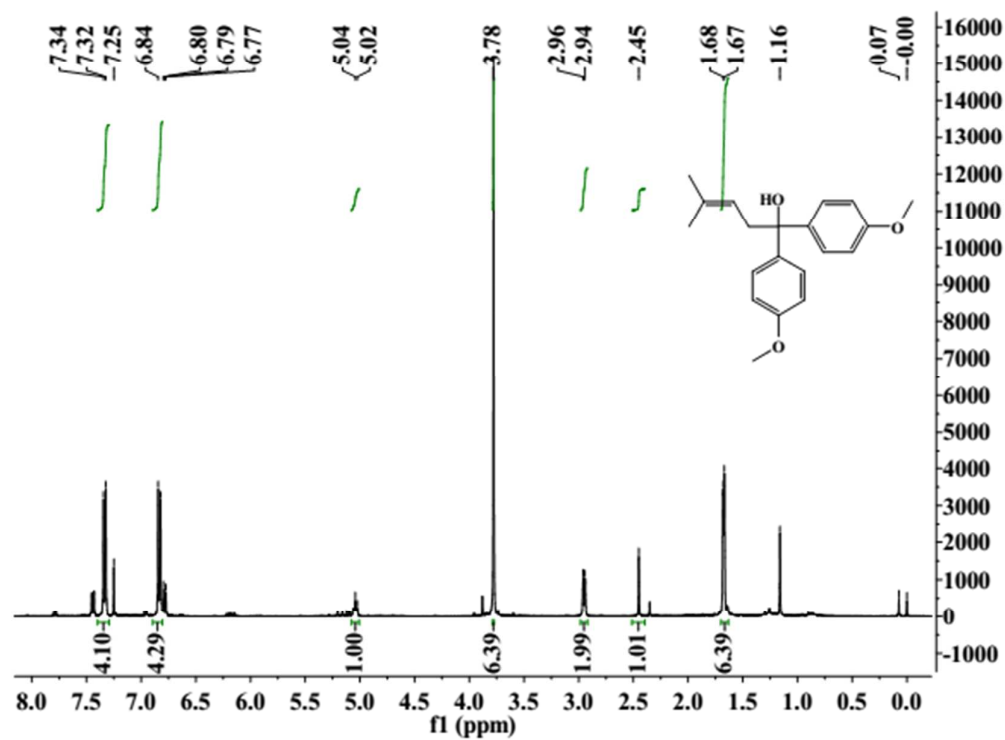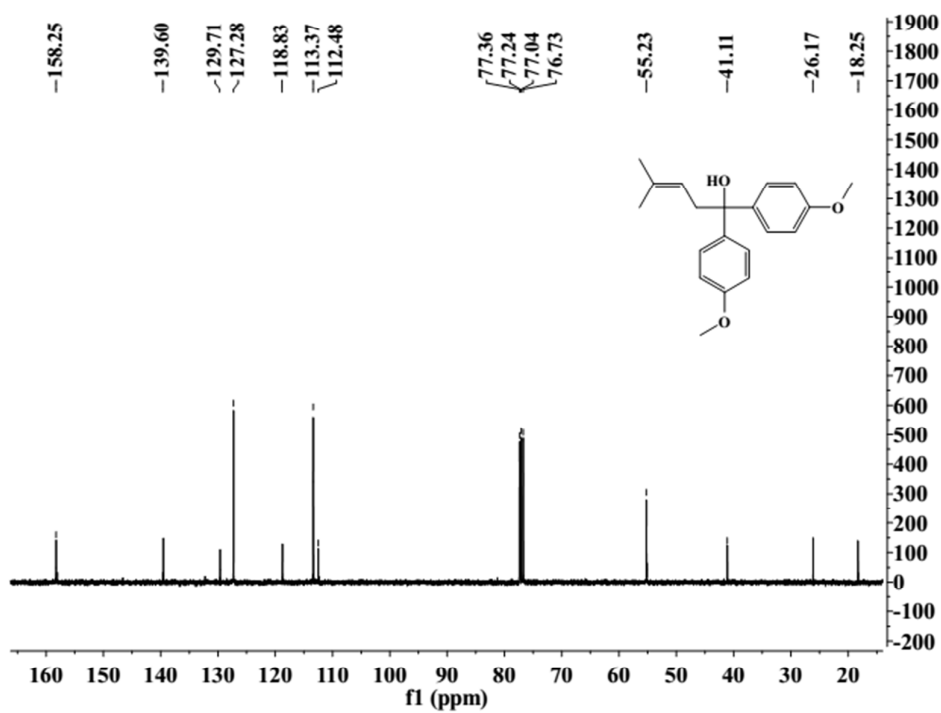

4c

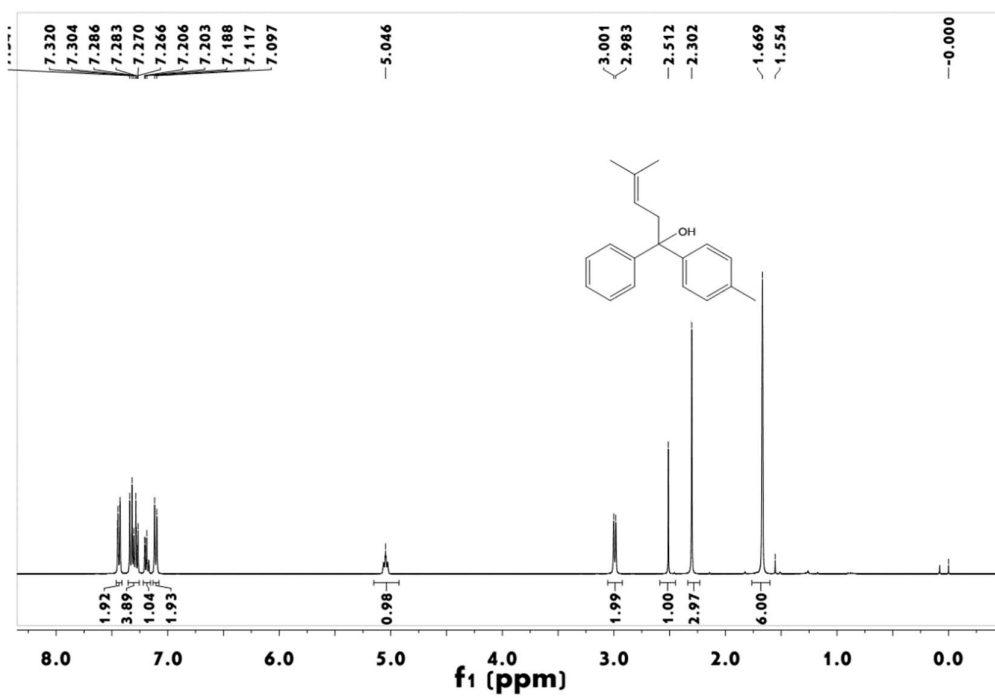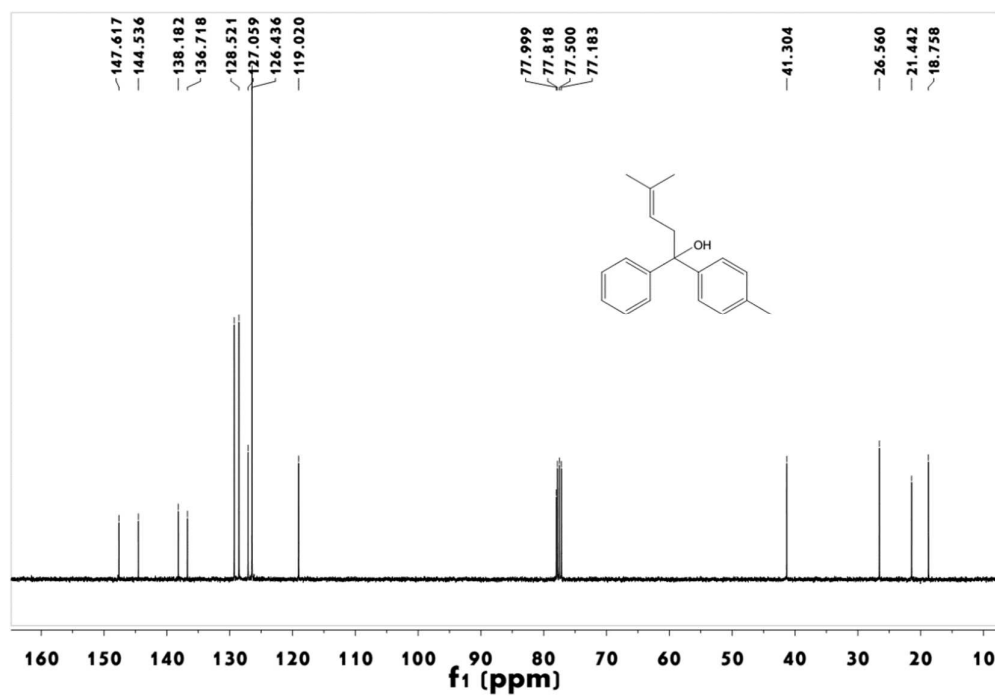

4d

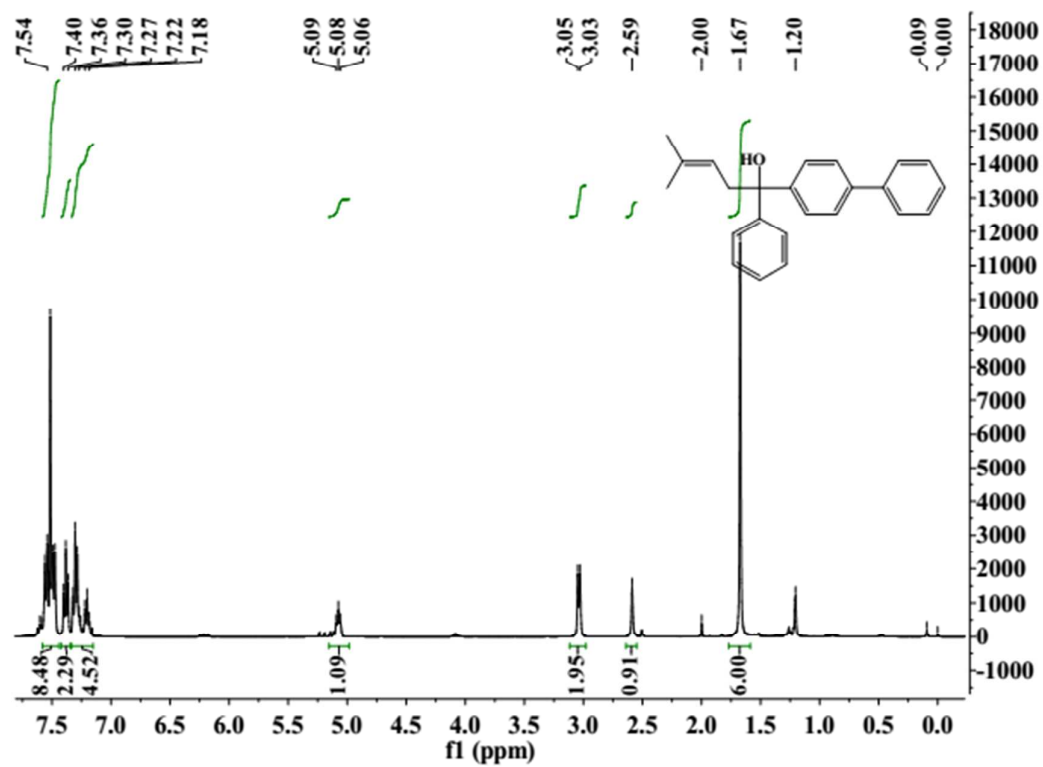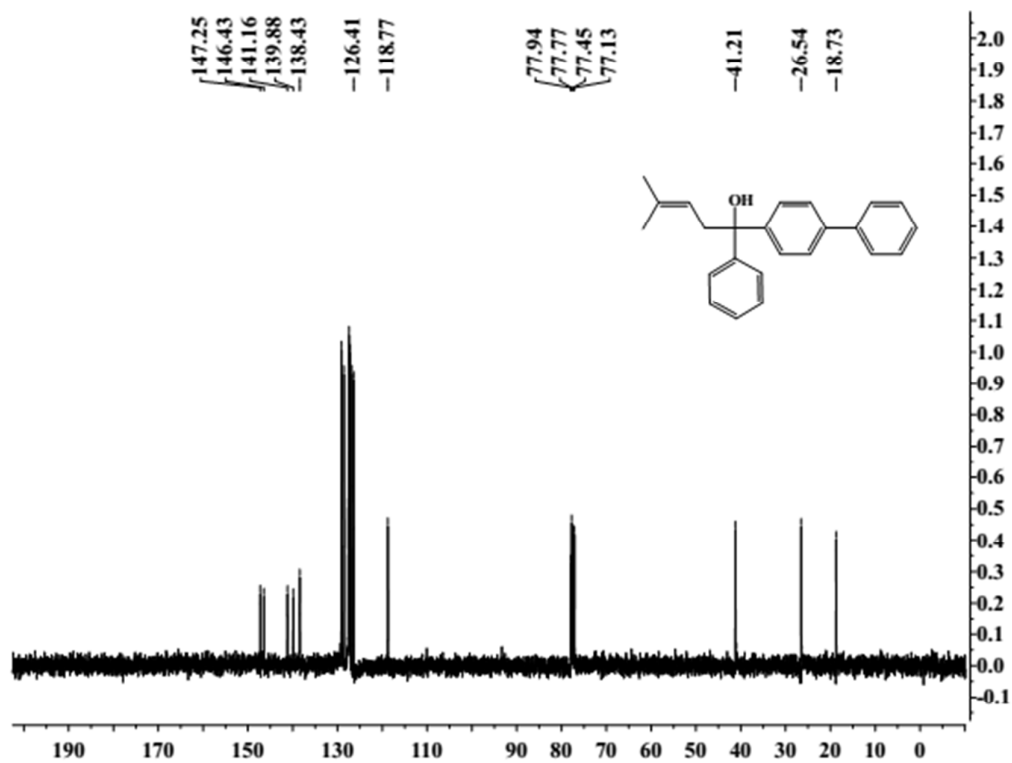

4e

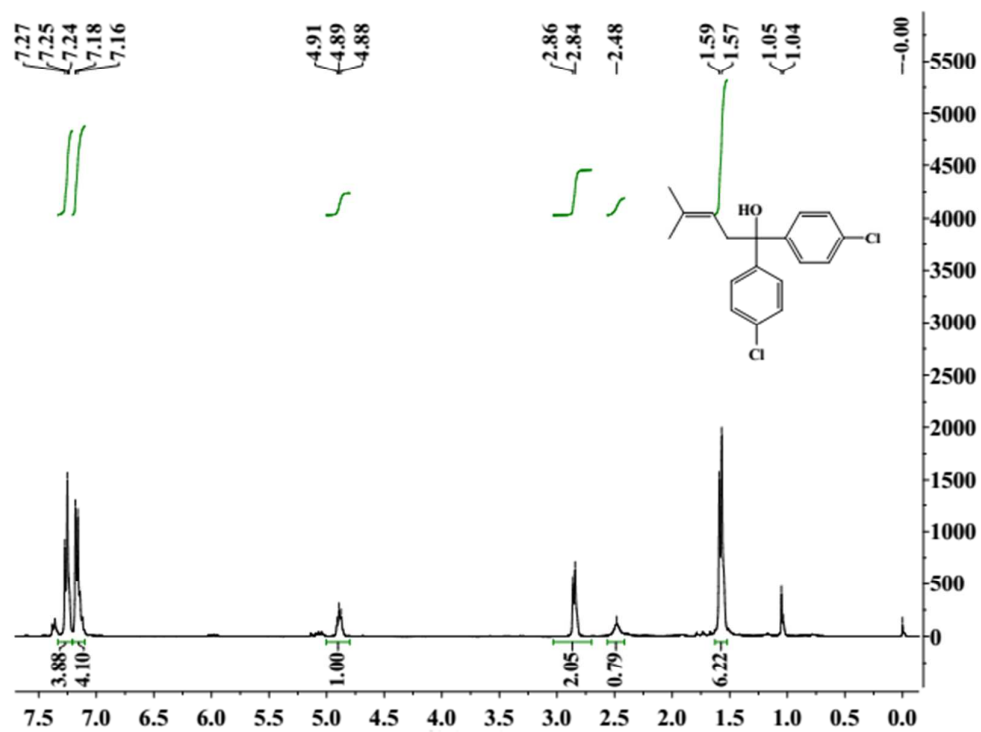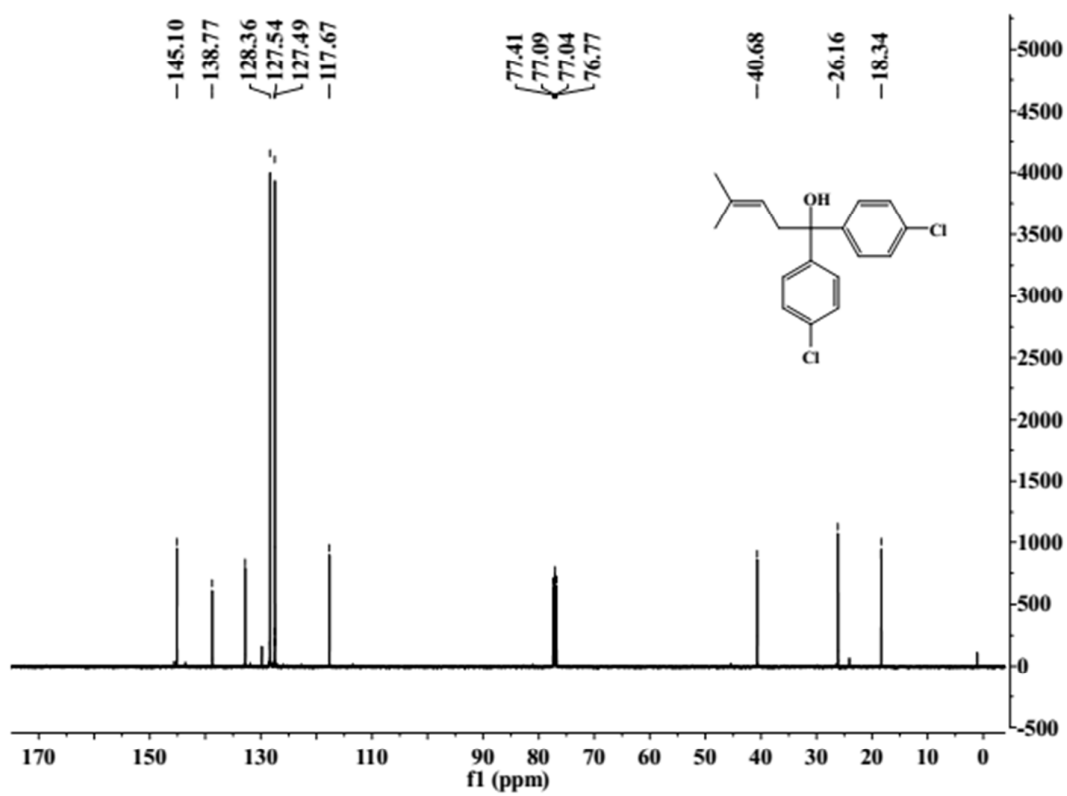

4i

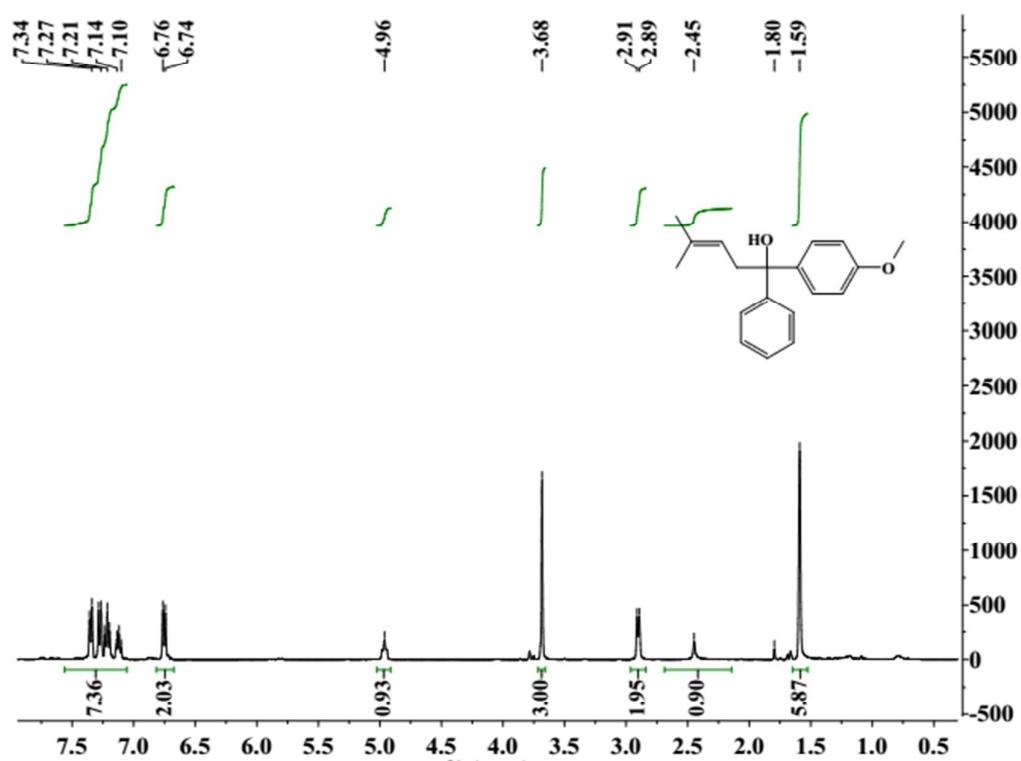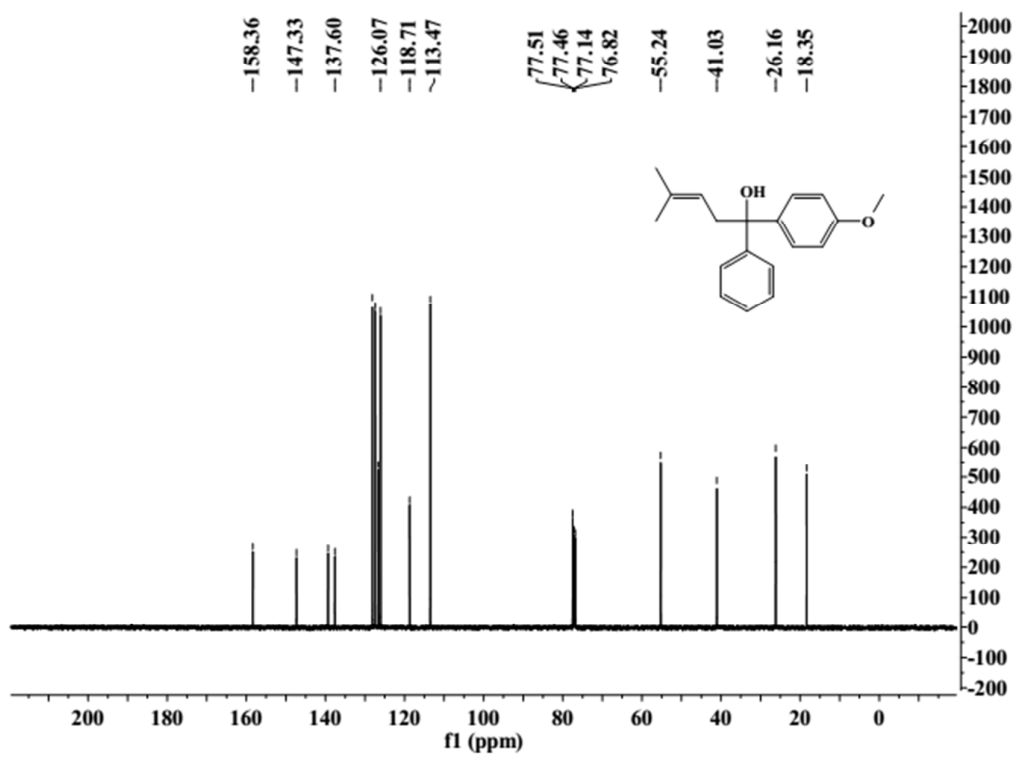



5a

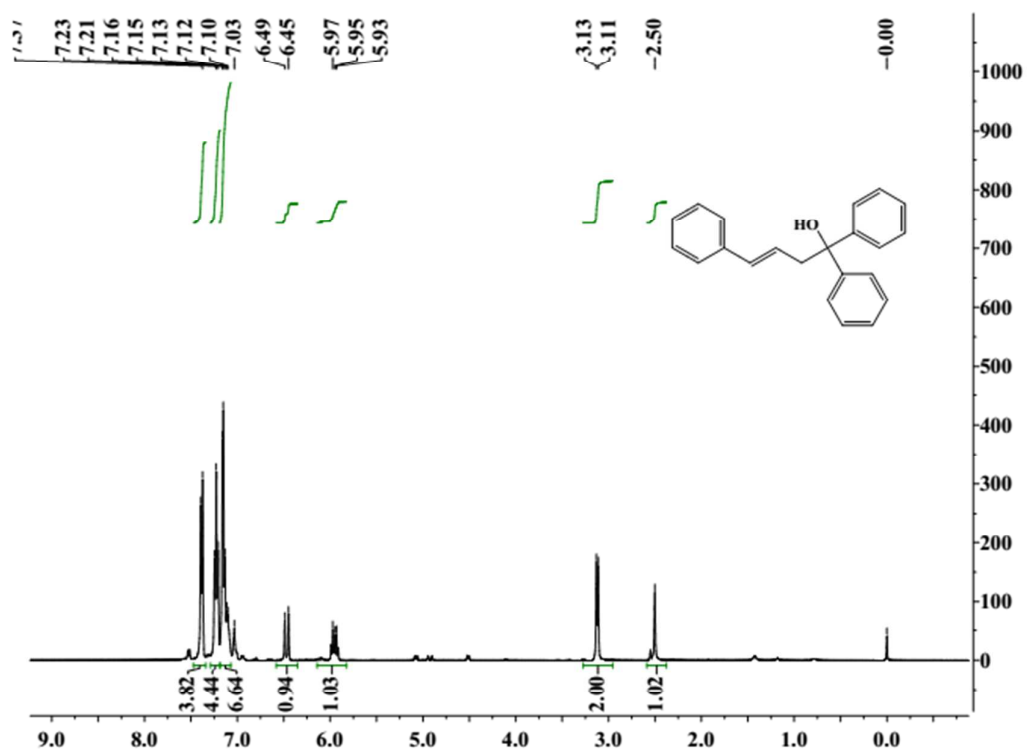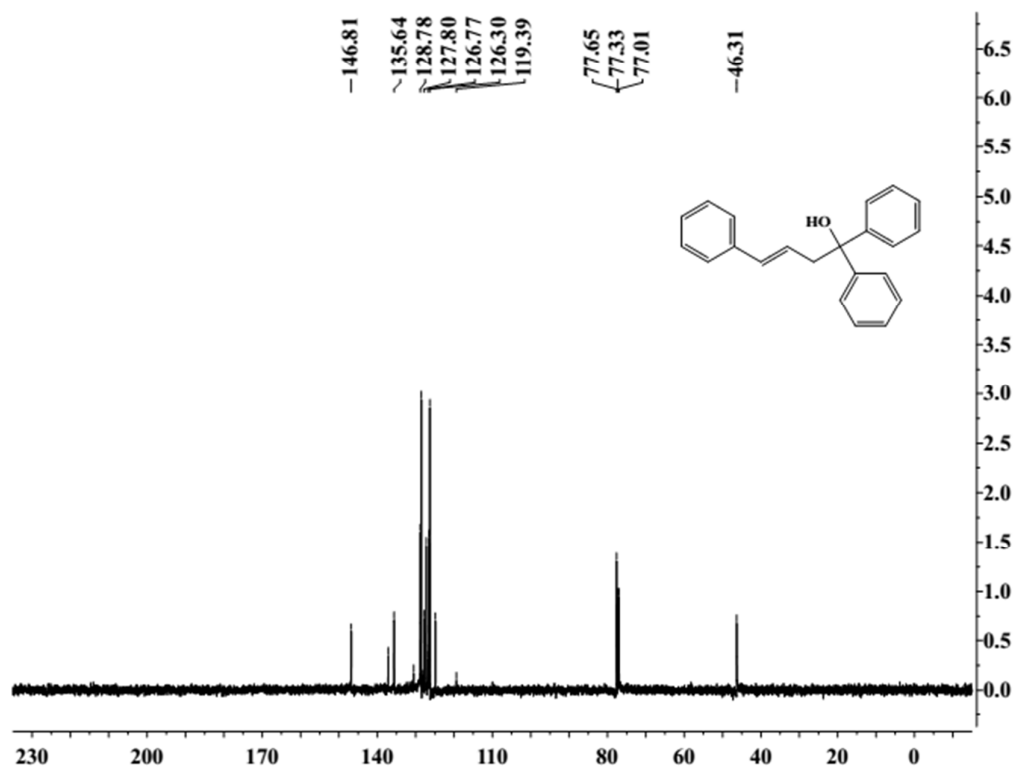

5b

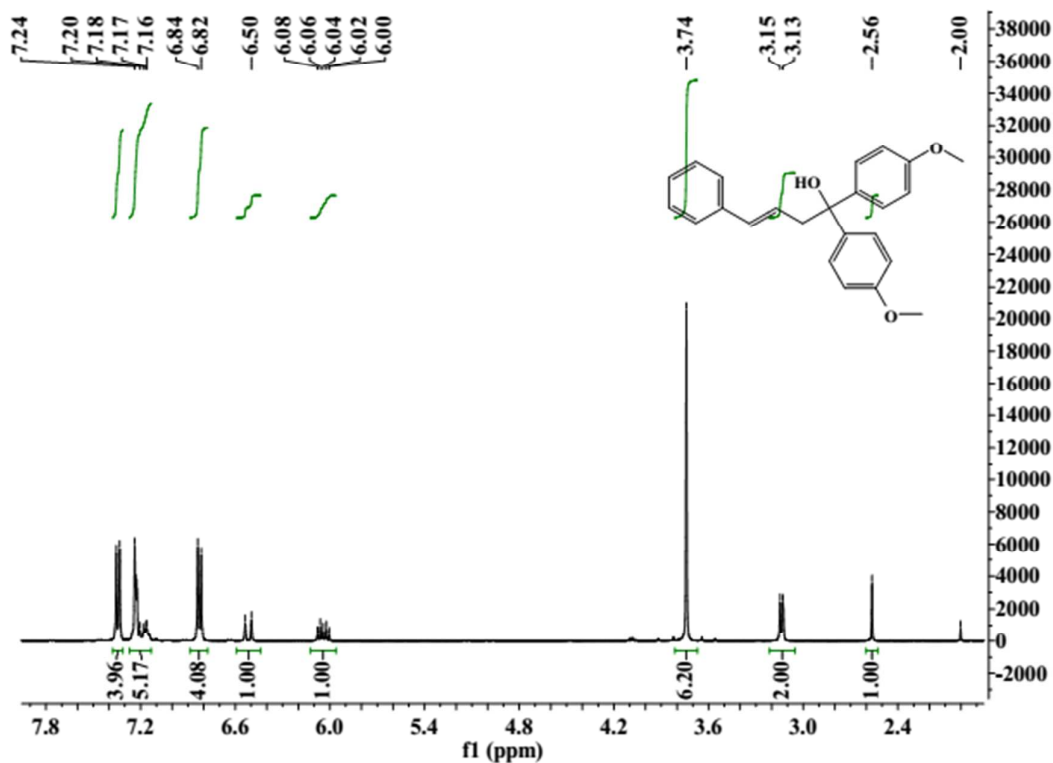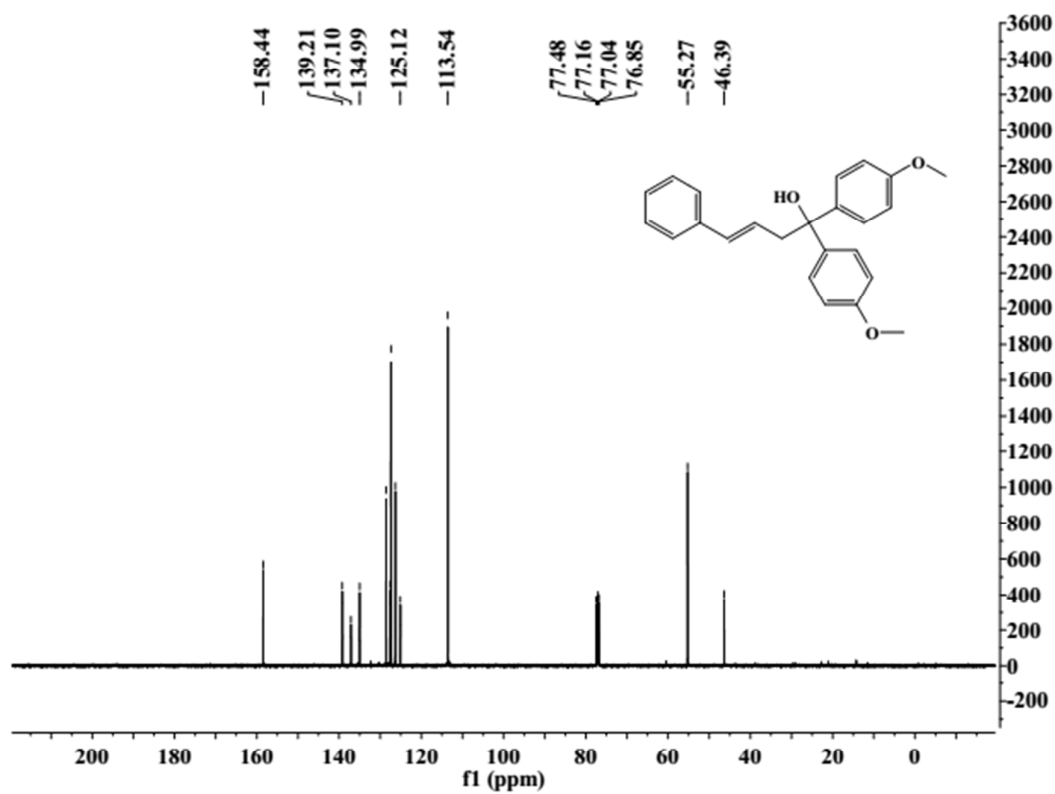

5c

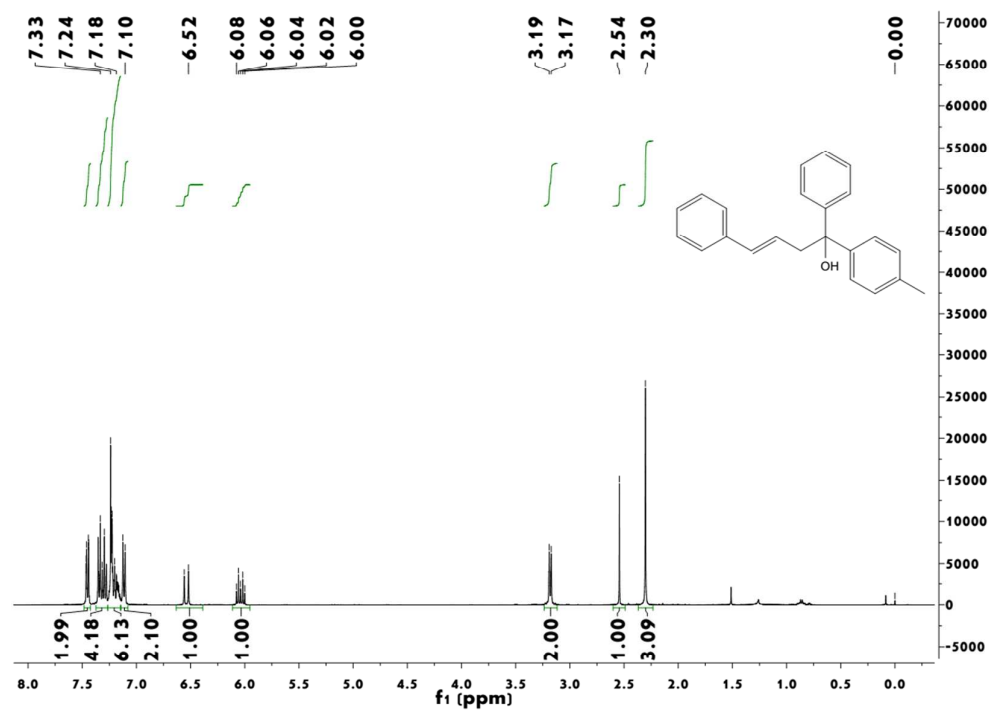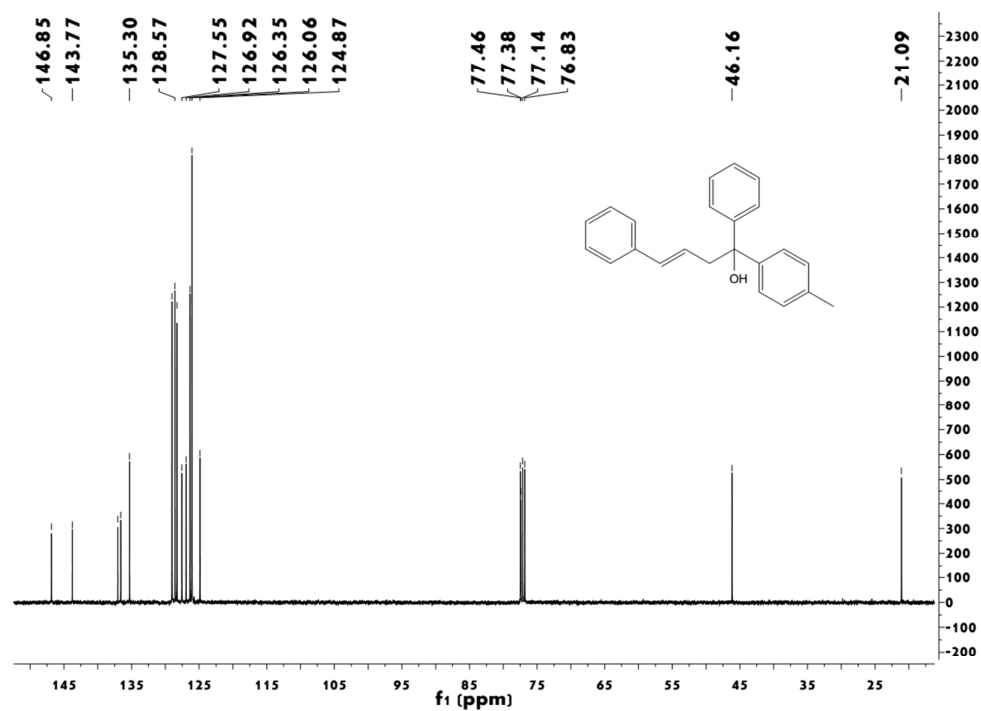

5d

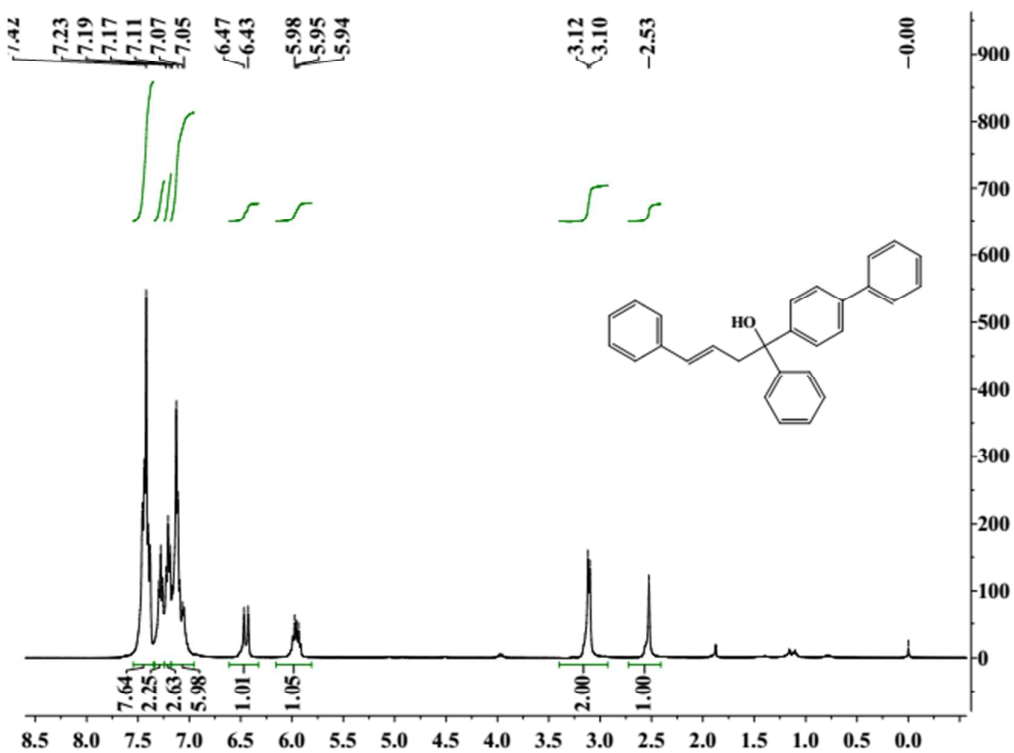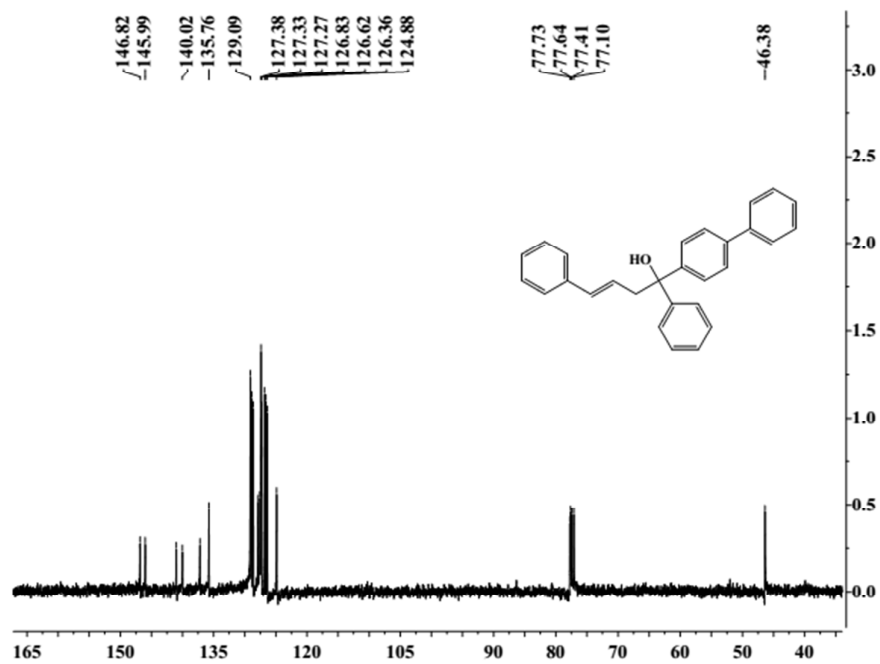

5e

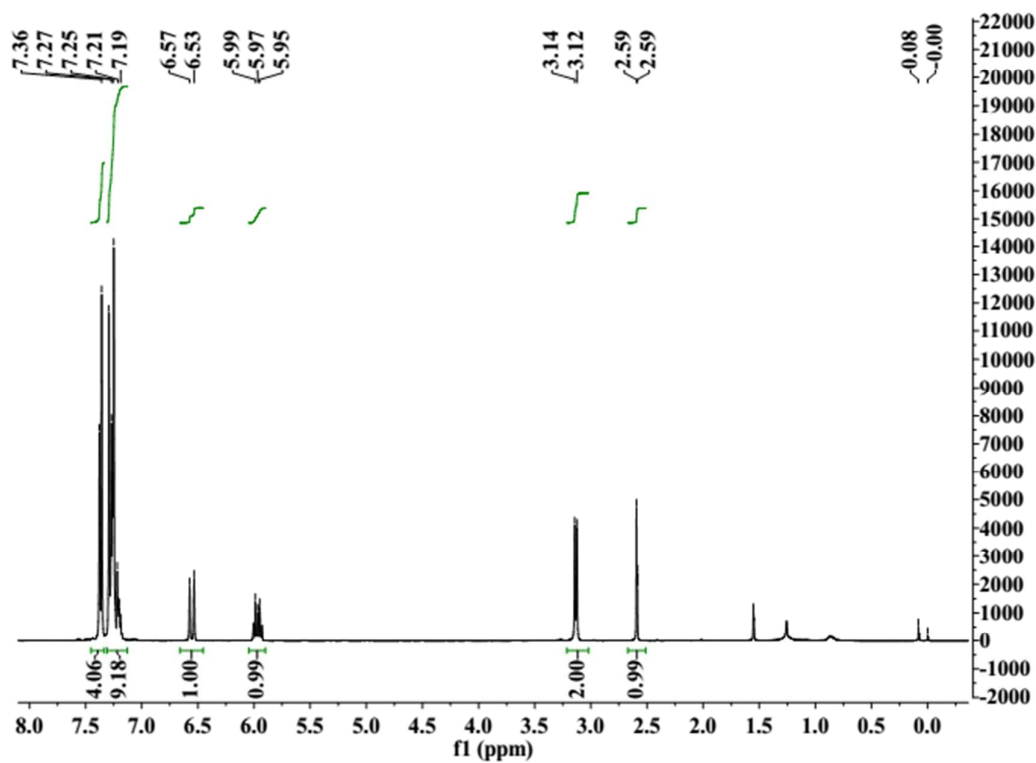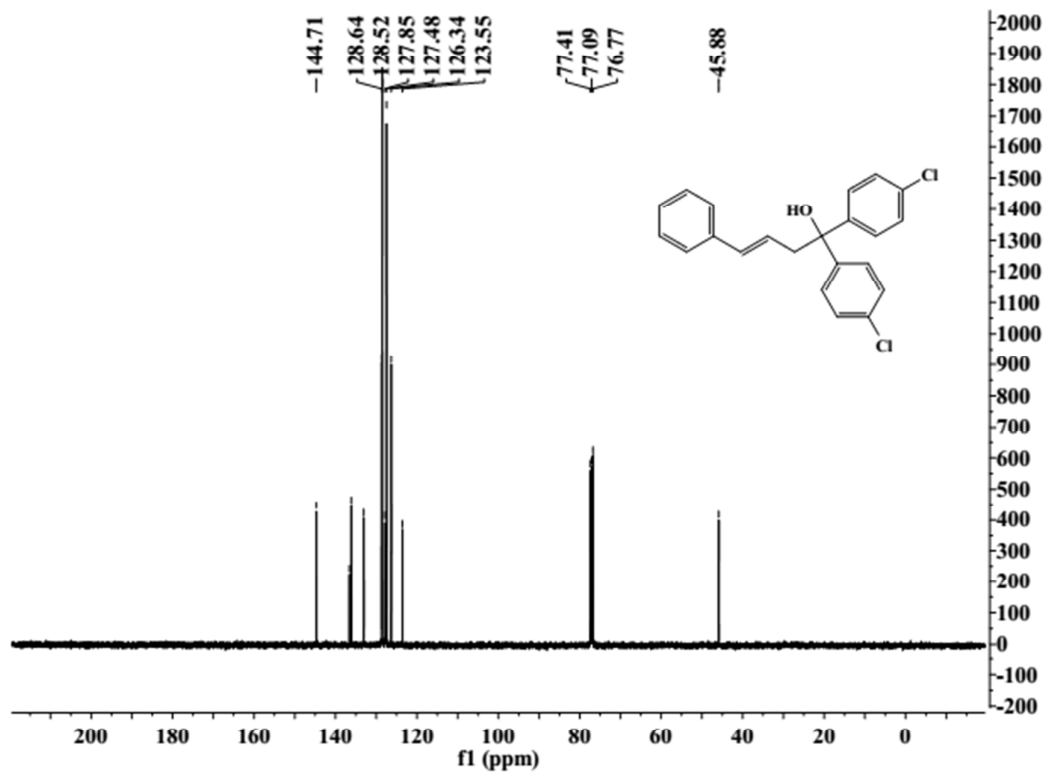

5f

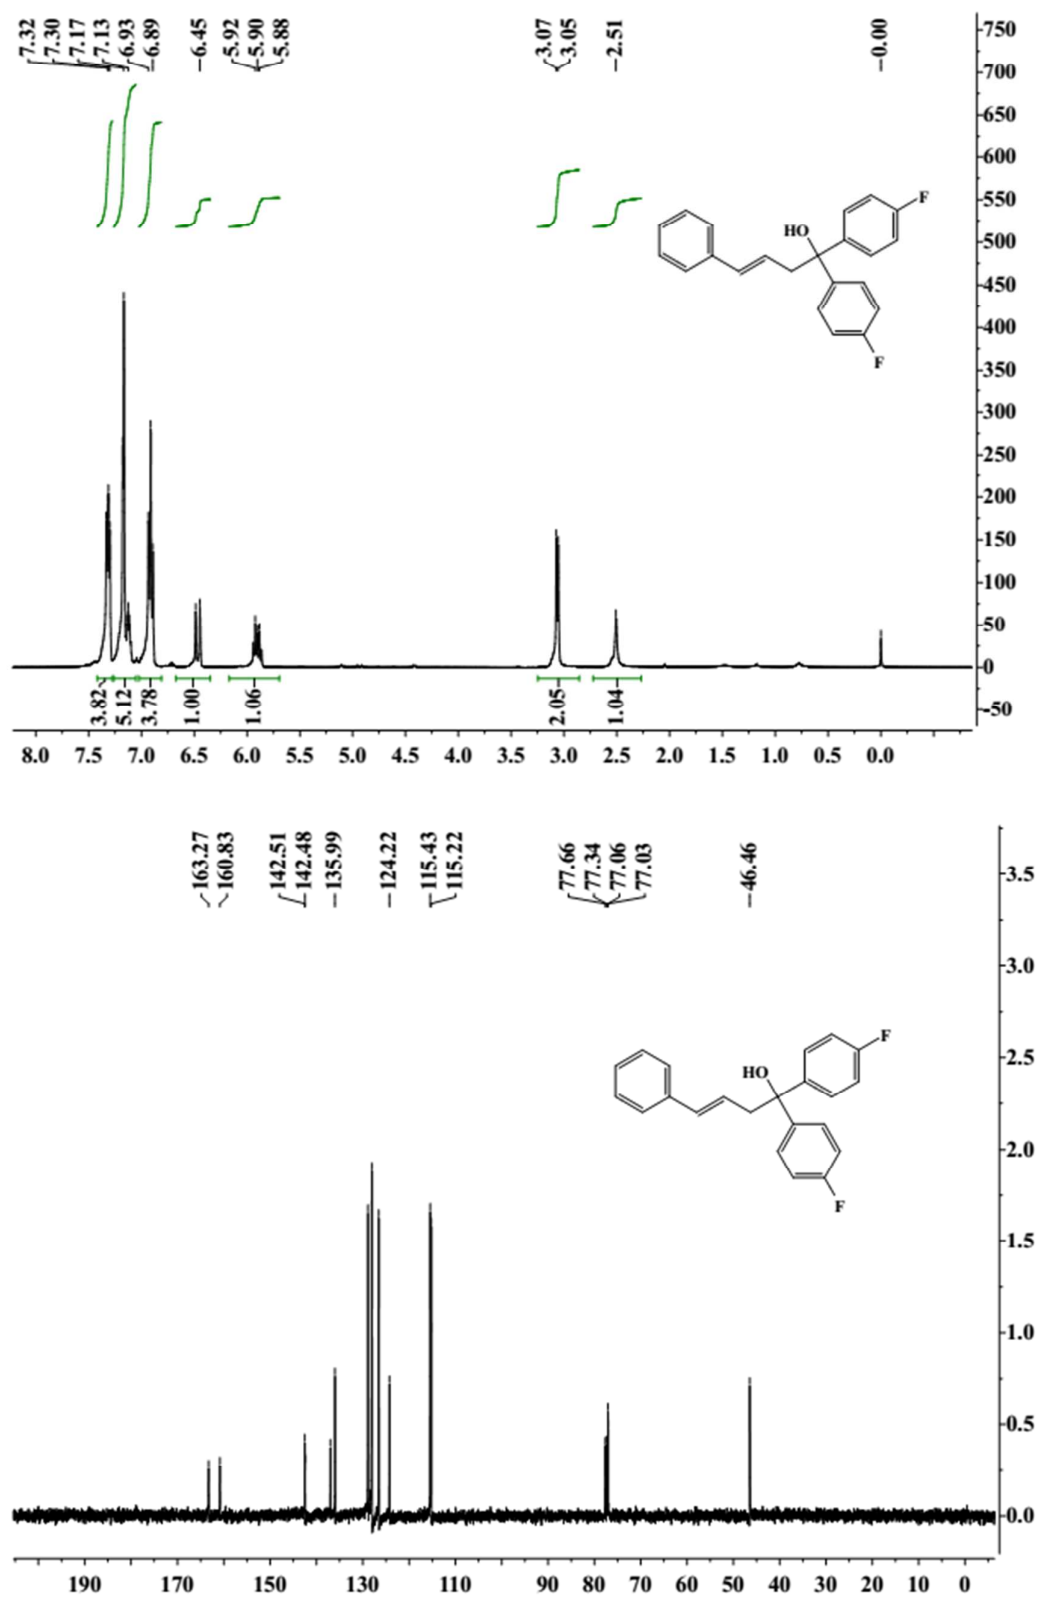

5i

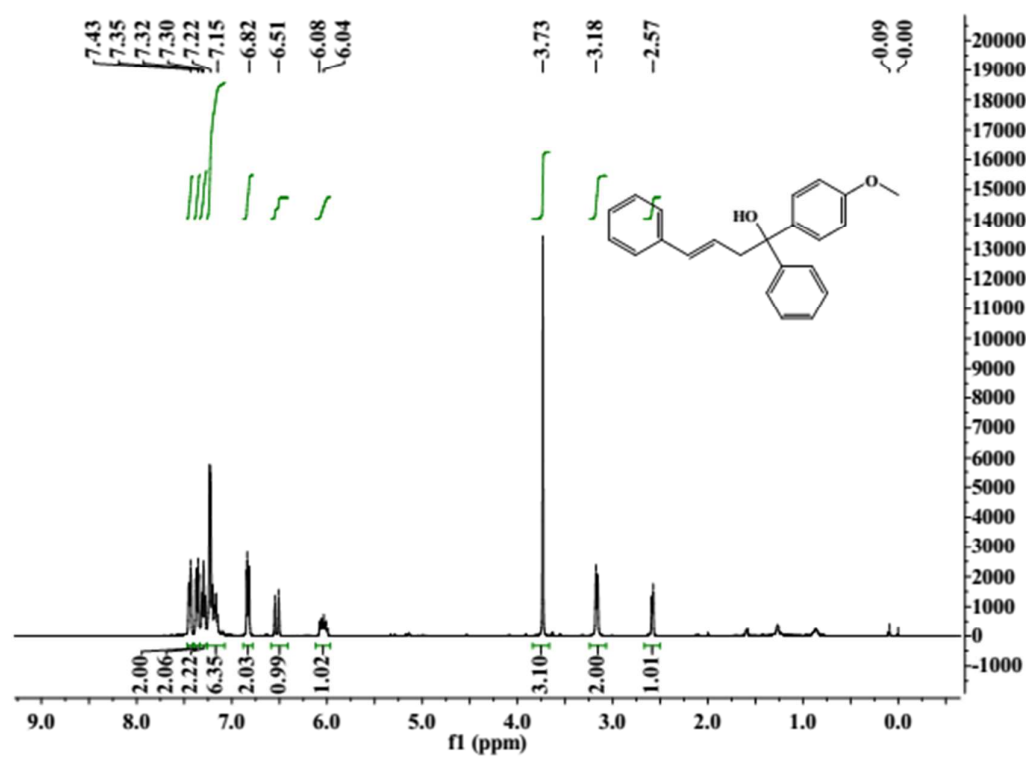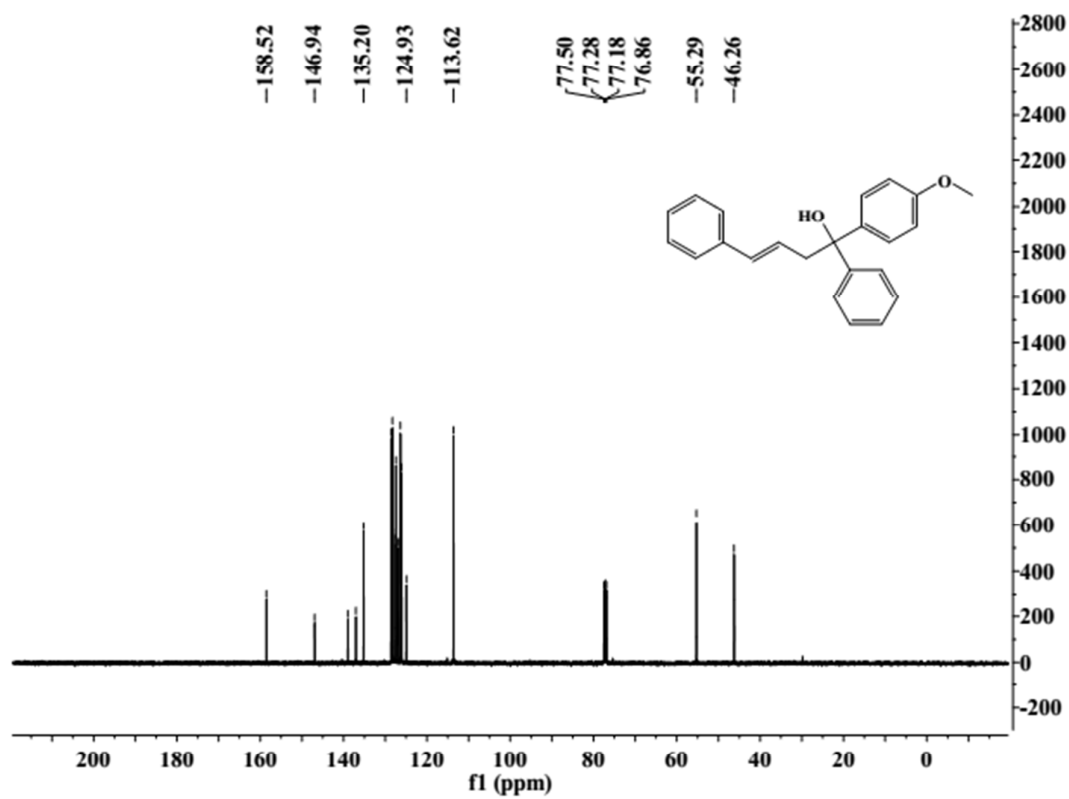

6a

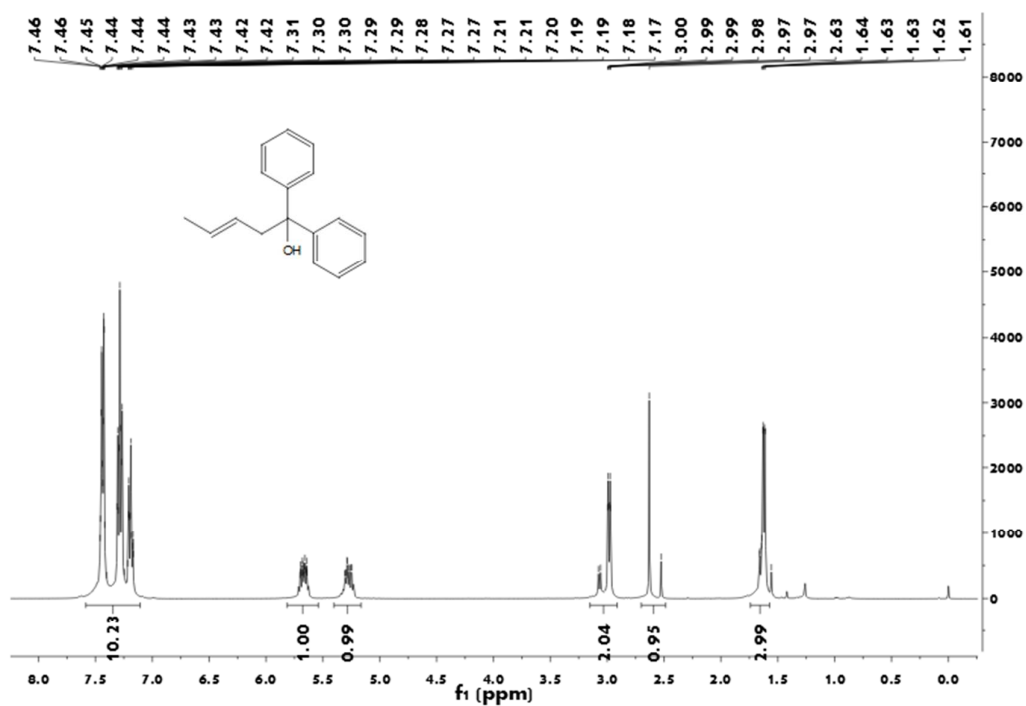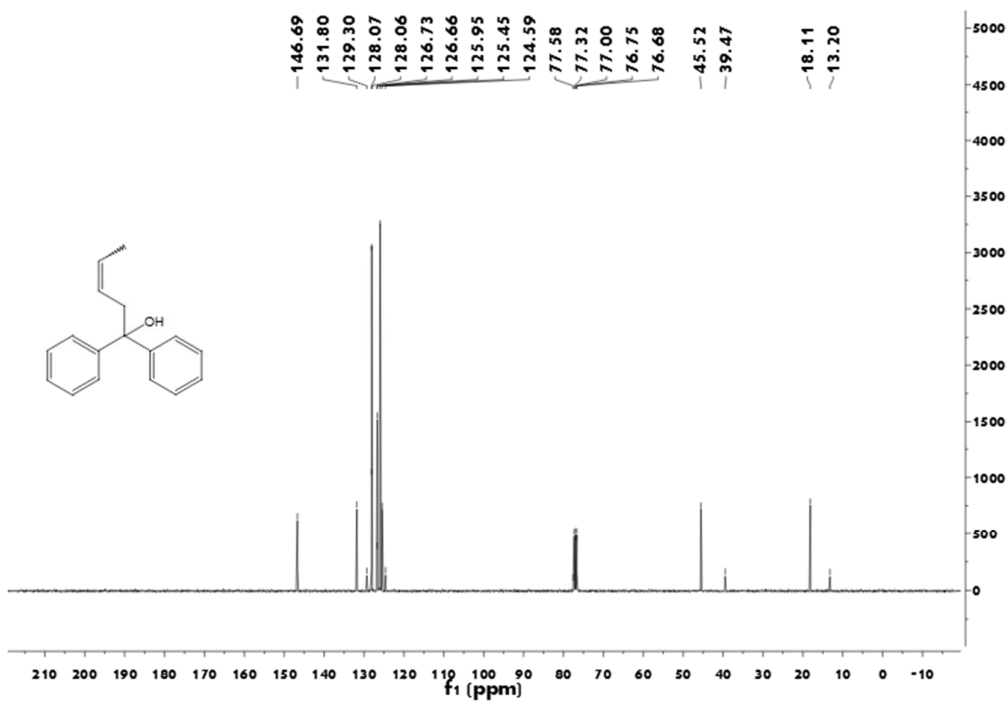



6c

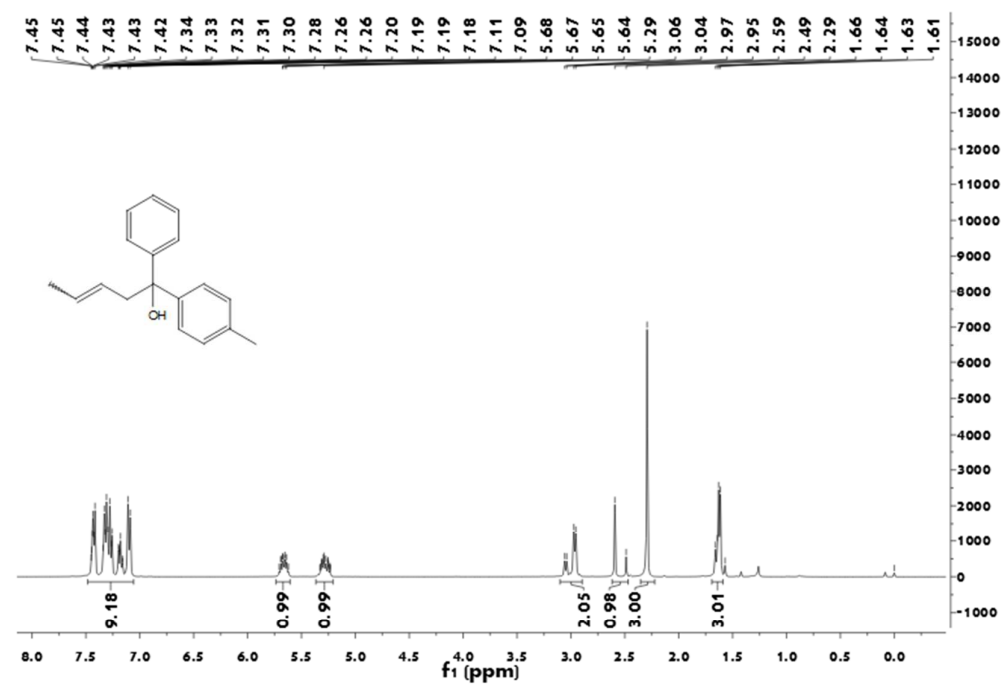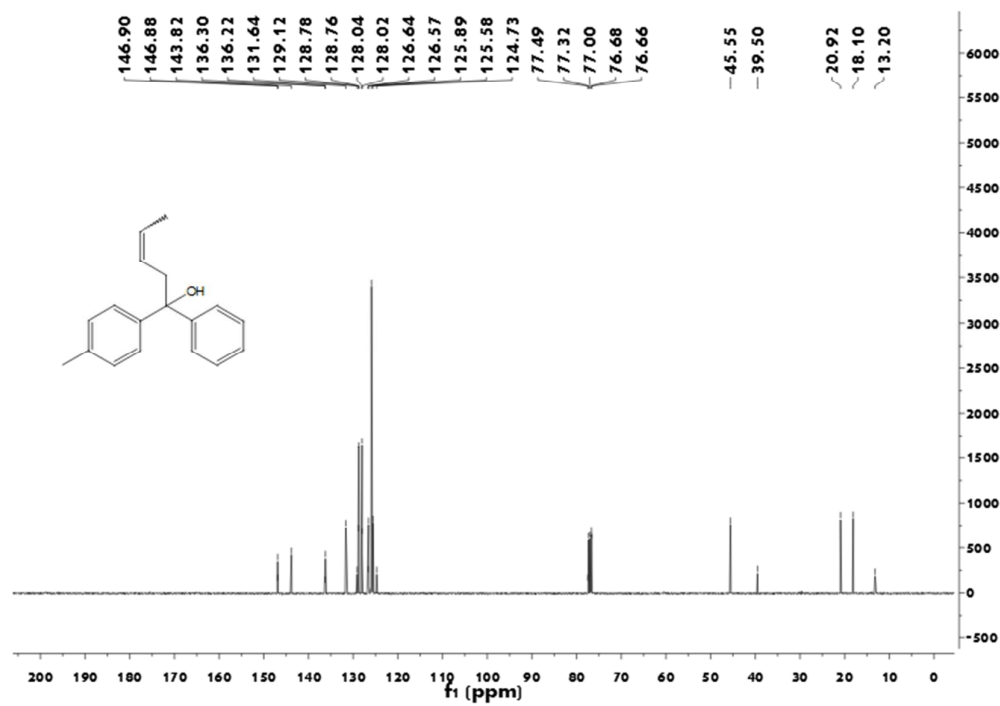

Supplement: Supplementary file 1 [file 5664885]
